# Supplementary material for: Chlorogenic acid alleviates chronic restraint stress-induced liver injury potentially via Nrf2-mediated inhibition of ferroptosis and mitochondrial apoptosis
Source: Royal Society of Chemistry journal article supplement (doi:10.1039/d5fo04627k), 2026-01-01
Supplement: d5fo04627k1.xlsx [file d5fo04627k1.xlsx]

## Sheet: Sheet1
Figure 1A(b) Total distance of movement(mm)
Unpaired t test	95.00% CI of diff.	Significantly different (P < 0.05)?	Summary	P Value
CON vs. CRS	-0.7826 to 0.5309	Yes	***	0.0007
Figure 1A(c) Crossing number
Unpaired t test	95.00% CI of diff.	Significantly different (P < 0.05)?	Summary	P Value
CON vs. CRS	-49.98 to -18.68	Yes	**	0.0037
Figure 1A(d) Rearing number
Unpaired t test	95.00% CI of diff.	Significantly different (P < 0.05)?	Summary	P Value
CON vs. CRS	-16.04 to -4.628	Yes	**	0.0073
Figure 1A(e) Center square duration(s)
Unpaired t test	95.00% CI of diff.	Significantly different (P < 0.05)?	Summary	P Value
CON vs. CRS	-26.69 to -12.43	Yes	**	0.0016
Figure 2B Average daily gain (g)
Unpaired t test	95.00% CI of diff.	Significantly different (P < 0.05)?	Summary	P Value
CON vs. CRS	28.18 to 51.49	Yes	****	<0.0001
Figure 2B(b) Average daily gain (g)
Tukey's multiple comparisons test	Mean Diff.	95.00% CI of diff.	Below threshold?	Summary	Adjusted P Value
CON vs. CON+CAH	-0.1258	-0.7826 to 0.5309	No	ns	0.9931	A-B
CON vs. CRS	4.127	3.470 to 4.783	Yes	****	<0.0001	A-C
CON vs. CRS+CAL	3.778	3.121 to 4.435	Yes	****	<0.0001	A-D
CON vs. CRS+CAM	2.561	1.928 to 3.194	Yes	****	<0.0001	A-E
CON vs. CRS+CAH	2.7	2.043 to 3.357	Yes	****	<0.0001	A-F
CON+CAH vs. CRS	4.252	3.596 to 4.909	Yes	****	<0.0001	B-C
CON+CAH vs. CRS+CAL	3.904	3.247 to 4.561	Yes	****	<0.0001	B-D
CON+CAH vs. CRS+CAM	2.687	2.054 to 3.320	Yes	****	<0.0001	B-E
CON+CAH vs. CRS+CAH	2.826	2.169 to 3.482	Yes	****	<0.0001	B-F
CRS vs. CRS+CAL	-0.3484	-1.005 to 0.3084	No	ns	0.6301	C-D
CRS vs. CRS+CAM	-1.566	-2.198 to -0.9327	Yes	****	<0.0001	C-E
CRS vs. CRS+CAH	-1.427	-2.084 to -0.7701	Yes	****	<0.0001	C-F
CRS+CAL vs. CRS+CAM	-1.217	-1.850 to -0.5843	Yes	****	<0.0001	D-E
CRS+CAL vs. CRS+CAH	-1.078	-1.735 to -0.4217	Yes	***	0.0001	D-F
CRS+CAM vs. CRS+CAH	0.1387	-0.4942 to 0.7716	No	ns	0.9873	E-F
Figure 2B(c) Food intake (g/d)
Tukey's multiple comparisons test	Mean Diff.	95.00% CI of diff.	Below threshold?	Summary	Adjusted P Value
CON vs. CON+CAH	1.528	-0.1281 to 3.184	No	ns	0.0892	A-B
CON vs. CRS	6.555	5.001 to 8.109	Yes	****	<0.0001	A-C
CON vs. CRS+CAL	5.532	3.979 to 7.086	Yes	****	<0.0001	A-D
CON vs. CRS+CAM	4.705	3.205 to 6.204	Yes	****	<0.0001	A-E
CON vs. CRS+CAH	4.396	2.797 to 5.996	Yes	****	<0.0001	A-F
CON+CAH vs. CRS	5.027	3.381 to 6.673	Yes	****	<0.0001	B-C
CON+CAH vs. CRS+CAL	4.004	2.358 to 5.650	Yes	****	<0.0001	B-D
CON+CAH vs. CRS+CAM	3.177	1.582 to 4.772	Yes	****	<0.0001	B-E
CON+CAH vs. CRS+CAH	2.868	1.179 to 4.558	Yes	****	<0.0001	B-F
CRS vs. CRS+CAL	-1.023	-2.566 to 0.5202	No	ns	0.4009	C-D
CRS vs. CRS+CAM	-1.85	-3.339 to -0.3621	Yes	**	0.0057	C-E
CRS vs. CRS+CAH	-2.159	-3.748 to -0.5697	Yes	**	0.0017	C-F
CRS+CAL vs. CRS+CAM	-0.8275	-2.316 to 0.6609	No	ns	0.6001	D-E
CRS+CAL vs. CRS+CAH	-1.136	-2.725 to 0.4533	No	ns	0.3147	D-F
CRS+CAM vs. CRS+CAH	-0.3085	-1.845 to 1.228	No	ns	0.9924	E-F
Figure 2B(d) Liver index (%)
Tukey's multiple comparisons test	Mean Diff.	95.00% CI of diff.	Below threshold?	Summary	Adjusted P Value
CON vs. CON+CAH	0.048	-0.4412 to 0.5372	No	ns	0.9996	A-B
CON vs. CRS	0.714	0.2903 to 1.138	Yes	***	0.0004	A-C
CON vs. CRS+CAL	0.553	0.1473 to 0.9587	Yes	**	0.0041	A-D
CON vs. CRS+CAM	0.193	-0.2564 to 0.6424	No	ns	0.7583	A-E
CON vs. CRS+CAH	0.2405	-0.2089 to 0.6899	No	ns	0.5621	A-F
CON+CAH vs. CRS	0.666	0.1768 to 1.155	Yes	**	0.0041	B-C
CON+CAH vs. CRS+CAL	0.505	0.03130 to 0.9787	Yes	*	0.0323	B-D
CON+CAH vs. CRS+CAM	0.145	-0.3667 to 0.6567	No	ns	0.9456	B-E
CON+CAH vs. CRS+CAH	0.1925	-0.3192 to 0.7042	No	ns	0.8426	B-F
CRS vs. CRS+CAL	-0.161	-0.5667 to 0.2447	No	ns	0.8117	C-D
CRS vs. CRS+CAM	-0.521	-0.9704 to -0.07161	Yes	*	0.0171	C-E
CRS vs. CRS+CAH	-0.4735	-0.9229 to -0.02411	Yes	*	0.0351	C-F
CRS+CAL vs. CRS+CAM	-0.36	-0.7924 to 0.07243	No	ns	0.1399	D-E
CRS+CAL vs. CRS+CAH	-0.3125	-0.7449 to 0.1199	No	ns	0.2533	D-F
CRS+CAM vs. CRS+CAH	0.0475	-0.4262 to 0.5212	No	ns	0.9995	E-F
Figure 2C(a) AST U/L
Tukey's multiple comparisons test	Mean Diff.	95.00% CI of diff.	Below threshold?	Summary	Adjusted P Value
CON vs. CON+CAH	0.297	-30.74 to 31.34	No	ns	>0.9999	A-B
CON vs. CRS	-45.88	-71.51 to -20.25	Yes	***	0.0001	A-C
CON vs. CRS+CAL	-36.13	-70.31 to -1.957	Yes	*	0.0336	A-D
CON vs. CRS+CAM	-12.37	-38.00 to 13.26	No	ns	0.6821	A-E
CON vs. CRS+CAH	-11	-42.04 to 20.04	No	ns	0.8839	A-F
CON+CAH vs. CRS	-46.18	-76.51 to -15.85	Yes	***	0.0009	B-C
CON+CAH vs. CRS+CAL	-36.43	-74.25 to 1.395	No	ns	0.0641	B-D
CON+CAH vs. CRS+CAM	-12.67	-43.00 to 17.66	No	ns	0.7948	B-E
CON+CAH vs. CRS+CAH	-11.3	-46.32 to 23.72	No	ns	0.9186	B-F
CRS vs. CRS+CAL	9.752	-23.78 to 43.28	No	ns	0.9461	C-D
CRS vs. CRS+CAM	33.51	8.749 to 58.27	Yes	**	0.0036	C-E
CRS vs. CRS+CAH	34.88	4.554 to 65.21	Yes	*	0.0171	C-F
CRS+CAL vs. CRS+CAM	23.76	-9.769 to 57.29	No	ns	0.2849	D-E
CRS+CAL vs. CRS+CAH	25.13	-12.70 to 62.95	No	ns	0.3515	D-F
CRS+CAM vs. CRS+CAH	1.37	-28.96 to 31.70	No	ns	>0.9999	E-F
Figure 2C(b) ALT U/L
Tukey's multiple comparisons test	Mean Diff.	95.00% CI of diff.	Below threshold?	Summary	Adjusted P Value
CON vs. CON+CAH	0.6829	-11.65 to 13.01	No	ns	>0.9999	A-B
CON vs. CRS	-24.56	-37.64 to -11.48	Yes	***	0.0001	A-C
CON vs. CRS+CAL	-18.42	-31.50 to -5.340	Yes	**	0.0031	A-D
CON vs. CRS+CAM	-6.249	-19.33 to 6.830	No	ns	0.6671	A-E
CON vs. CRS+CAH	-7.032	-20.11 to 6.047	No	ns	0.5532	A-F
CON+CAH vs. CRS	-25.24	-38.32 to -12.16	Yes	****	<0.0001	B-C
CON+CAH vs. CRS+CAL	-19.1	-32.18 to -6.023	Yes	**	0.0021	B-D
CON+CAH vs. CRS+CAM	-6.932	-20.01 to 6.147	No	ns	0.5678	B-E
CON+CAH vs. CRS+CAH	-7.715	-20.79 to 5.364	No	ns	0.4563	B-F
CRS vs. CRS+CAL	6.137	-7.650 to 19.92	No	ns	0.7271	C-D
CRS vs. CRS+CAM	18.31	4.520 to 32.09	Yes	**	0.0054	C-E
CRS vs. CRS+CAH	17.52	3.737 to 31.31	Yes	**	0.008	C-F
CRS+CAL vs. CRS+CAM	12.17	-1.617 to 25.96	No	ns	0.1036	D-E
CRS+CAL vs. CRS+CAH	11.39	-2.400 to 25.17	No	ns	0.1442	D-F
CRS+CAM vs. CRS+CAH	-0.7832	-14.57 to 13.00	No	ns	>0.9999	E-F
Figure 3B(b) TUNEL Fluorescence Ratio
Tukey's multiple comparisons test	Mean Diff.	95.00% CI of diff.	Below threshold?	Summary	Adjusted P Value
CON vs. CRS	-1.591	-2.272 to -0.9093	Yes	***	0.0003	A-B
CON vs. CRS+CGA	-0.3336	-1.015 to 0.3477	No	ns	0.4457	A-C
CON vs. CRS+CGA+Brusatol	-1.904	-2.585 to -1.223	Yes	****	<0.0001	A-D
CRS vs. CRS+CGA	1.257	0.5757 to 1.938	Yes	**	0.0016	B-C
CRS vs. CRS+CGA+Brusatol	-0.3133	-0.9946 to 0.3680	No	ns	0.4943	B-D
CRS+CGA vs. CRS+CGA+Brusatol	-1.57	-2.252 to -0.8890	Yes	***	0.0004	C-D
Figure 3C(b) Cleaved caspase-3/β-actin
Tukey's multiple comparisons test	Mean Diff.	95.00% CI of diff.	Below threshold?	Summary	Adjusted P Value
CON vs. CRS	-0.518	-0.7889 to -0.2471	Yes	**	0.0013	A-B
CON vs. CRS+CGA	-0.002492	-0.2734 to 0.2684	No	ns	>0.9999	A-C
CON vs. CRS+CGA+Brusatol	-0.3967	-0.6676 to -0.1258	Yes	**	0.0068	A-D
CRS vs. CRS+CGA	0.5155	0.2446 to 0.7864	Yes	**	0.0013	B-C
CRS vs. CRS+CGA+Brusatol	0.1213	-0.1496 to 0.3922	No	ns	0.5146	B-D
CRS+CGA vs. CRS+CGA+Brusatol	-0.3942	-0.6651 to -0.1233	Yes	**	0.0071	C-D
Figure 3C(c) Cleaved caspase-9/β-actin
Tukey's multiple comparisons test	Mean Diff.	95.00% CI of diff.	Below threshold?	Summary	Adjusted P Value
CON vs. CRS	-0.3811	-0.6617 to -0.1004	Yes	*	0.0105	A-B
CON vs. CRS+CGA	0.05562	-0.2250 to 0.3363	No	ns	0.9179	A-C
CON vs. CRS+CGA+Brusatol	-0.3087	-0.5893 to -0.02802	Yes	*	0.032	A-D
CRS vs. CRS+CGA	0.4367	0.1561 to 0.7173	Yes	**	0.0047	B-C
CRS vs. CRS+CGA+Brusatol	0.07241	-0.2082 to 0.3531	No	ns	0.8407	B-D
CRS+CGA vs. CRS+CGA+Brusatol	-0.3643	-0.6449 to -0.08364	Yes	*	0.0135	C-D
Figure 3C(d) Cytochrome C/β-actin
Tukey's multiple comparisons test	Mean Diff.	95.00% CI of diff.	Below threshold?	Summary	Adjusted P Value
CON vs. CRS	-0.2983	-0.5014 to -0.09522	Yes	**	0.0067	A-B
CON vs. CRS+CGA	-0.02296	-0.2260 to 0.1801	No	ns	0.9826	A-C
CON vs. CRS+CGA+Brusatol	-0.4972	-0.7003 to -0.2942	Yes	***	0.0002	A-D
CRS vs. CRS+CGA	0.2753	0.07226 to 0.4784	Yes	*	0.0106	B-C
CRS vs. CRS+CGA+Brusatol	-0.1989	-0.4020 to 0.004141	No	ns	0.0548	B-D
CRS+CGA vs. CRS+CGA+Brusatol	-0.4743	-0.6774 to -0.2712	Yes	***	0.0003	C-D
Figure 3C(e) Bax/Bcl-2
Tukey's multiple comparisons test	Mean Diff.	95.00% CI of diff.	Below threshold?	Summary	Adjusted P Value
CON vs. CRS	-0.2066	-0.3970 to -0.01630	Yes	*	0.0341	A-B
CON vs. CRS+CGA	0.0332	-0.1572 to 0.2235	No	ns	0.9416	A-C
CON vs. CRS+CGA+Brusatol	-0.2729	-0.4632 to -0.08251	Yes	**	0.0077	A-D
CRS vs. CRS+CGA	0.2398	0.04950 to 0.4302	Yes	*	0.0159	B-C
CRS vs. CRS+CGA+Brusatol	-0.06621	-0.2566 to 0.1241	No	ns	0.6917	B-D
CRS+CGA vs. CRS+CGA+Brusatol	-0.3061	-0.4964 to -0.1157	Yes	**	0.0039	C-D
Figure 4A(b) Positive area(%)
Tukey's multiple comparisons test	Mean Diff.	95.00% CI of diff.	Below threshold?	Summary	Adjusted P Value
CON vs. CRS	-16.23	-21.22 to -11.24	Yes	****	<0.0001	A-B
CON vs. CRS+CGA	-0.044	-5.035 to 4.947	No	ns	>0.9999	A-C
CON vs. CRS+CGA+Brusatol	-9.876	-14.87 to -4.885	Yes	**	0.001	A-D
CRS vs. CRS+CGA	16.19	11.20 to 21.18	Yes	****	<0.0001	B-C
CRS vs. CRS+CGA+Brusatol	6.355	1.364 to 11.35	Yes	*	0.015	B-D
CRS+CGA vs. CRS+CGA+Brusatol	-9.832	-14.82 to -4.841	Yes	**	0.001	C-D
Figure 4B(a) Fe(μmol/gprot)
Tukey's multiple comparisons test	Mean Diff.	95.00% CI of diff.	Below threshold?	Summary	Adjusted P Value
CON vs. CRS	-1.591	-2.272 to -0.9093	Yes	***	0.0003	A-B
CON vs. CRS+CGA	-0.3336	-1.015 to 0.3477	No	ns	0.4457	A-C
CON vs. CRS+CGA+Brusatol	-1.904	-2.585 to -1.223	Yes	****	<0.0001	A-D
CRS vs. CRS+CGA	1.257	0.5757 to 1.938	Yes	**	0.0016	B-C
CRS vs. CRS+CGA+Brusatol	-0.3133	-0.9946 to 0.3680	No	ns	0.4943	B-D
CRS+CGA vs. CRS+CGA+Brusatol	-1.57	-2.252 to -0.8890	Yes	***	0.0004	C-D
Figure 4B(b) Serum Fe(μmol/L)
Tukey's multiple comparisons test	Mean Diff.	95.00% CI of diff.	Below threshold?	Summary	Adjusted P Value
CON vs. CRS	-6.394	-9.625 to -3.164	Yes	**	0.001	A-B
CON vs. CRS+CGA	1.667	-1.563 to 4.897	No	ns	0.4049	A-C
CON vs. CRS+CGA+Brusatol	-5.846	-9.076 to -2.616	Yes	**	0.0018	A-D
CRS vs. CRS+CGA	8.061	4.831 to 11.29	Yes	***	0.0002	B-C
CRS vs. CRS+CGA+Brusatol	0.548	-2.682 to 3.778	No	ns	0.9458	B-D
CRS+CGA vs. CRS+CGA+Brusatol	-7.513	-10.74 to -4.283	Yes	***	0.0003	C-D
Figure 4C(b) TFR1/β-actin
Tukey's multiple comparisons test	Mean Diff.	95.00% CI of diff.	Below threshold?	Summary	Adjusted P Value
CON vs. CRS	-0.3666	-0.5966 to -0.1366	Yes	**	0.0041	A-B
CON vs. CRS+CGA	0.03561	-0.1944 to 0.2656	No	ns	0.9578	A-C
CON vs. CRS+CGA+Brusatol	-0.2578	-0.4877 to -0.02779	Yes	*	0.0291	A-D
CRS vs. CRS+CGA	0.4022	0.1722 to 0.6322	Yes	**	0.0023	B-C
CRS vs. CRS+CGA+Brusatol	0.1088	-0.1212 to 0.3388	No	ns	0.4722	B-D
CRS+CGA vs. CRS+CGA+Brusatol	-0.2934	-0.5234 to -0.06339	Yes	*	0.0149	C-D
Figure 4C(c) FPN/β-actin
Tukey's multiple comparisons test	Mean Diff.	95.00% CI of diff.	Below threshold?	Summary	Adjusted P Value
CON vs. CRS	0.2454	0.1039 to 0.3870	Yes	**	0.0024	A-B
CON vs. CRS+CGA	0.06519	-0.07638 to 0.2068	No	ns	0.4932	A-C
CON vs. CRS+CGA+Brusatol	0.3759	0.2344 to 0.5175	Yes	***	0.0001	A-D
CRS vs. CRS+CGA	-0.1802	-0.3218 to -0.03867	Yes	*	0.015	B-C
CRS vs. CRS+CGA+Brusatol	0.1305	-0.01107 to 0.2721	No	ns	0.0712	B-D
CRS+CGA vs. CRS+CGA+Brusatol	0.3107	0.1692 to 0.4523	Yes	***	0.0005	C-D
Figure 4D(a) TFR1/GAPDH mRNA
Tukey's multiple comparisons test	Mean Diff.	95.00% CI of diff.	Below threshold?	Summary	Adjusted P Value
CON vs. CRS	-0.4787	-0.6204 to -0.3370	Yes	****	<0.0001	A-B
CON vs. CRS+CGA	0.01117	-0.1305 to 0.1529	No	ns	0.9952	A-C
CON vs. CRS+CGA+Brusatol	-0.2107	-0.3524 to -0.06901	Yes	**	0.004	A-D
CRS vs. CRS+CGA	0.4899	0.3481 to 0.6316	Yes	****	<0.0001	B-C
CRS vs. CRS+CGA+Brusatol	0.268	0.1263 to 0.4097	Yes	***	0.0006	B-D
CRS+CGA vs. CRS+CGA+Brusatol	-0.2219	-0.3636 to -0.08017	Yes	**	0.0027	C-D
Figure 4D(a) FPN/GAPDH mRNA
Tukey's multiple comparisons test	Mean Diff.	95.00% CI of diff.	Below threshold?	Summary	Adjusted P Value
CON vs. CRS	0.4036	0.2573 to 0.5499	Yes	****	<0.0001	A-B
CON vs. CRS+CGA	-0.1437	-0.2901 to 0.002585	No	ns	0.0547	A-C
CON vs. CRS+CGA+Brusatol	0.2648	0.1184 to 0.4111	Yes	***	0.0008	A-D
CRS vs. CRS+CGA	-0.5474	-0.6937 to -0.4010	Yes	****	<0.0001	B-C
CRS vs. CRS+CGA+Brusatol	-0.1388	-0.2852 to 0.007490	No	ns	0.0649	B-D
CRS+CGA vs. CRS+CGA+Brusatol	0.4085	0.2622 to 0.5548	Yes	****	<0.0001	C-D
Figure 5A(a) ROS fluorescence intensity
Tukey's multiple comparisons test	Mean Diff.	95.00% CI of diff.	Below threshold?	Summary	Adjusted P Value
CON vs. CRS	-0.272	-0.4439 to -0.1001	Yes	**	0.0043	A-B
CON vs. CRS+CGA	0.001	-0.1709 to 0.1729	No	ns	>0.9999	A-C
CON vs. CRS+CGA+Brusatol	-0.255	-0.4269 to -0.08315	Yes	**	0.0063	A-D
CRS vs. CRS+CGA	0.273	0.1011 to 0.4449	Yes	**	0.0042	B-C
CRS vs. CRS+CGA+Brusatol	0.017	-0.1549 to 0.1889	No	ns	0.9882	B-D
CRS+CGA vs. CRS+CGA+Brusatol	-0.256	-0.4279 to -0.08415	Yes	**	0.0061	C-D
Figure 5B(a) CAT (U/mgprot)
Tukey's multiple comparisons test	Mean Diff.	95.00% CI of diff.	Below threshold?	Summary	Adjusted P Value
CON vs. CRS	48.12	19.66 to 76.58	Yes	**	0.0023	A-B
CON vs. CRS+CGA	2.067	-26.39 to 30.53	No	ns	0.9956	A-C
CON vs. CRS+CGA+Brusatol	44.8	16.34 to 73.26	Yes	**	0.0038	A-D
CRS vs. CRS+CGA	-46.05	-76.47 to -15.62	Yes	**	0.0049	B-C
CRS vs. CRS+CGA+Brusatol	-3.322	-33.75 to 27.10	No	ns	0.9855	B-D
CRS+CGA vs. CRS+CGA+Brusatol	42.73	12.30 to 73.15	Yes	**	0.0078	C-D
Figure 5B(b) GSH (μmol/gprot)
Tukey's multiple comparisons test	Mean Diff.	95.00% CI of diff.	Below threshold?	Summary	Adjusted P Value
CON vs. CRS	7.097	4.549 to 9.646	Yes	****	<0.0001	A-B
CON vs. CRS+CGA	2.601	-0.3043 to 5.507	No	ns	0.0902	A-C
CON vs. CRS+CGA+Brusatol	7.241	4.336 to 10.15	Yes	****	<0.0001	A-D
CRS vs. CRS+CGA	-4.496	-7.402 to -1.591	Yes	**	0.0015	B-C
CRS vs. CRS+CGA+Brusatol	0.1437	-2.762 to 3.049	No	ns	0.999	B-D
CRS+CGA vs. CRS+CGA+Brusatol	4.64	1.417 to 7.863	Yes	**	0.0032	C-D
Figure 5B(c) SOD (U/mgprot)
Tukey's multiple comparisons test	Mean Diff.	95.00% CI of diff.	Below threshold?	Summary	Adjusted P Value
CON vs. CRS	25.41	7.630 to 43.19	Yes	**	0.0051	A-B
CON vs. CRS+CGA	-5.305	-24.78 to 14.17	No	ns	0.8535	A-C
CON vs. CRS+CGA+Brusatol	24.72	6.941 to 42.50	Yes	**	0.0062	A-D
CRS vs. CRS+CGA	-30.72	-51.76 to -9.677	Yes	**	0.0043	B-C
CRS vs. CRS+CGA+Brusatol	-0.6889	-20.17 to 18.79	No	ns	0.9996	B-D
CRS+CGA vs. CRS+CGA+Brusatol	30.03	8.988 to 51.07	Yes	**	0.0051	C-D
Figure 5C(a) MDA (nmol/mgprot)
Tukey's multiple comparisons test	Mean Diff.	95.00% CI of diff.	Below threshold?	Summary	Adjusted P Value
CON vs. CRS	-0.4005	-0.6539 to -0.1472	Yes	**	0.0014	A-B
CON vs. CRS+CGA	0.00165	-0.2517 to 0.2550	No	ns	>0.9999	A-C
CON vs. CRS+CGA+Brusatol	-0.4254	-0.7126 to -0.1381	Yes	**	0.0026	A-D
CRS vs. CRS+CGA	0.4022	0.1314 to 0.6730	Yes	**	0.0025	B-C
CRS vs. CRS+CGA+Brusatol	-0.02483	-0.3276 to 0.2780	No	ns	0.9956	B-D
CRS+CGA vs. CRS+CGA+Brusatol	-0.427	-0.7298 to -0.1242	Yes	**	0.0041	C-D
Figure 5C(b) 4-HNE(ng/L)
Tukey's multiple comparisons test	Mean Diff.	95.00% CI of diff.	Below threshold?	Summary	Adjusted P Value
CON vs. CRS	-43.1	-55.04 to -31.16	Yes	****	<0.0001	A-B
CON vs. CRS+CGA	-13.12	-25.79 to -0.4571	Yes	*	0.041	A-C
CON vs. CRS+CGA+Brusatol	-48.35	-59.78 to -36.92	Yes	****	<0.0001	A-D
CRS vs. CRS+CGA	29.98	17.32 to 42.65	Yes	****	<0.0001	B-C
CRS vs. CRS+CGA+Brusatol	-5.247	-16.68 to 6.184	No	ns	0.5681	B-D
CRS+CGA vs. CRS+CGA+Brusatol	-35.23	-47.42 to -23.04	Yes	****	<0.0001	C-D
Figure 6A(b) SLC7A11 IOD
Tukey's multiple comparisons test	Mean Diff.	95.00% CI of diff.	Below threshold?	Summary	Adjusted P Value
CON vs. CRS	26.89	19.81 to 33.96	Yes	****	<0.0001	A-B
CON vs. CRS+CGA	-4.709	-11.78 to 2.363	No	ns	0.222	A-C
CON vs. CRS+CGA+Brusatol	25.9	18.83 to 32.97	Yes	****	<0.0001	A-D
CRS vs. CRS+CGA	-31.59	-38.67 to -24.52	Yes	****	<0.0001	B-C
CRS vs. CRS+CGA+Brusatol	-0.9878	-8.060 to 6.084	No	ns	0.9683	B-D
CRS+CGA vs. CRS+CGA+Brusatol	30.61	23.53 to 37.68	Yes	****	<0.0001	C-D
Figure 6A(c) GPX4 IOD
Tukey's multiple comparisons test	Mean Diff.	95.00% CI of diff.	Below threshold?	Summary	Adjusted P Value
CON vs. CRS	40.08	26.09 to 54.07	Yes	****	<0.0001	A-B
CON vs. CRS+CGA	7.501	-6.486 to 21.49	No	ns	0.3752	A-C
CON vs. CRS+CGA+Brusatol	38.38	24.39 to 52.37	Yes	***	0.0001	A-D
CRS vs. CRS+CGA	-32.58	-46.56 to -18.59	Yes	***	0.0003	B-C
CRS vs. CRS+CGA+Brusatol	-1.697	-15.68 to 12.29	No	ns	0.9787	B-D
CRS+CGA vs. CRS+CGA+Brusatol	30.88	16.89 to 44.87	Yes	***	0.0005	C-D
Figure 6B(b) SLC7A11/β-actin
Tukey's multiple comparisons test	Mean Diff.	95.00% CI of diff.	Below threshold?	Summary	Adjusted P Value
CON vs. CRS	0.4013	0.1796 to 0.6230	Yes	**	0.0018	A-B
CON vs. CRS+CGA	-0.0226	-0.2443 to 0.1991	No	ns	0.9871	A-C
CON vs. CRS+CGA+Brusatol	0.4341	0.2124 to 0.6558	Yes	**	0.0011	A-D
CRS vs. CRS+CGA	-0.4239	-0.6456 to -0.2022	Yes	**	0.0013	B-C
CRS vs. CRS+CGA+Brusatol	0.03282	-0.1889 to 0.2545	No	ns	0.9627	B-D
CRS+CGA vs. CRS+CGA+Brusatol	0.4567	0.2350 to 0.6784	Yes	***	0.0008	C-D
Figure 6B(c) GPX4/β-actin
Tukey's multiple comparisons test	Mean Diff.	95.00% CI of diff.	Below threshold?	Summary	Adjusted P Value
CON vs. CRS	0.3003	0.07984 to 0.5208	Yes	*	0.0103	A-B
CON vs. CRS+CGA	0.0725	-0.1480 to 0.2930	No	ns	0.7253	A-C
CON vs. CRS+CGA+Brusatol	0.4889	0.2684 to 0.7094	Yes	***	0.0005	A-D
CRS vs. CRS+CGA	-0.2278	-0.4483 to -0.007335	Yes	*	0.0431	B-C
CRS vs. CRS+CGA+Brusatol	0.1886	-0.03190 to 0.4091	No	ns	0.0961	B-D
CRS+CGA vs. CRS+CGA+Brusatol	0.4164	0.1959 to 0.6369	Yes	**	0.0014	C-D
Figure 6C(a) SLC7A11/GAPDH mRNA
Tukey's multiple comparisons test	Mean Diff.	95.00% CI of diff.	Below threshold?	Summary	Adjusted P Value
CON vs. CRS	0.7585	0.6477 to 0.8692	Yes	****	<0.0001	A-B
CON vs. CRS+CGA	-0.06374	-0.1745 to 0.04698	No	ns	0.3609	A-C
CON vs. CRS+CGA+Brusatol	0.4371	0.3264 to 0.5478	Yes	****	<0.0001	A-D
CRS vs. CRS+CGA	-0.8222	-0.9329 to -0.7115	Yes	****	<0.0001	B-C
CRS vs. CRS+CGA+Brusatol	-0.3214	-0.4321 to -0.2107	Yes	****	<0.0001	B-D
CRS+CGA vs. CRS+CGA+Brusatol	0.5008	0.3901 to 0.6115	Yes	****	<0.0001	C-D
Figure 6C(b) GPX4/GAPDH mRNA
Tukey's multiple comparisons test	Mean Diff.	95.00% CI of diff.	Below threshold?	Summary	Adjusted P Value
CON vs. CRS	0.5592	0.4135 to 0.7048	Yes	****	<0.0001	A-B
CON vs. CRS+CGA	0.08826	-0.05742 to 0.2339	No	ns	0.3204	A-C
CON vs. CRS+CGA+Brusatol	0.4923	0.3466 to 0.6380	Yes	****	<0.0001	A-D
CRS vs. CRS+CGA	-0.4709	-0.6166 to -0.3252	Yes	****	<0.0001	B-C
CRS vs. CRS+CGA+Brusatol	-0.06688	-0.2126 to 0.07879	No	ns	0.5437	B-D
CRS+CGA vs. CRS+CGA+Brusatol	0.404	0.2583 to 0.5497	Yes	****	<0.0001	C-D
Figure 7A(b) Relative Fluorensence Intensity
Tukey's multiple comparisons test	Mean Diff.	95.00% CI of diff.	Below threshold?	Summary	Adjusted P Value
CON vs. CRS	0.6327	0.4830 to 0.7823	Yes	****	<0.0001	A-B
CON vs. CRS+CGA	0.0228	-0.1268 to 0.1724	No	ns	0.9596	A-C
CON vs. CRS+CGA+Brusatol	0.779	0.6294 to 0.9287	Yes	****	<0.0001	A-D
CRS vs. CRS+CGA	-0.6099	-0.7595 to -0.4602	Yes	****	<0.0001	B-C
CRS vs. CRS+CGA+Brusatol	0.1463	-0.003300 to 0.2960	No	ns	0.0552	B-D
CRS+CGA vs. CRS+CGA+Brusatol	0.7562	0.6066 to 0.9059	Yes	****	<0.0001	C-D
Figure 7B(b) C-Nrf2/β-actin
Tukey's multiple comparisons test	Mean Diff.	95.00% CI of diff.	Below threshold?	Summary	Adjusted P Value
CON vs. CRS	0.6725	0.4751 to 0.8699	Yes	****	<0.0001	A-B
CON vs. CRS+CGA	-0.09584	-0.2932 to 0.1015	No	ns	0.4521	A-C
CON vs. CRS+CGA+Brusatol	0.6084	0.4110 to 0.8057	Yes	****	<0.0001	A-D
CRS vs. CRS+CGA	-0.7683	-0.9657 to -0.5710	Yes	****	<0.0001	B-C
CRS vs. CRS+CGA+Brusatol	-0.06413	-0.2615 to 0.1332	No	ns	0.732	B-D
CRS+CGA vs. CRS+CGA+Brusatol	0.7042	0.5068 to 0.9016	Yes	****	<0.0001	C-D
Figure 7B(c) N-Nrf2/Lamin B
Tukey's multiple comparisons test	Mean Diff.	95.00% CI of diff.	Below threshold?	Summary	Adjusted P Value
CON vs. CRS	0.331	0.1044 to 0.5577	Yes	**	0.0069	A-B
CON vs. CRS+CGA	-0.01449	-0.2411 to 0.2122	No	ns	0.9967	A-C
CON vs. CRS+CGA+Brusatol	0.6047	0.3781 to 0.8314	Yes	***	0.0001	A-D
CRS vs. CRS+CGA	-0.3455	-0.5722 to -0.1189	Yes	**	0.0053	B-C
CRS vs. CRS+CGA+Brusatol	0.2737	0.04705 to 0.5004	Yes	*	0.0199	B-D
CRS+CGA vs. CRS+CGA+Brusatol	0.6192	0.3926 to 0.8459	Yes	***	0.0001	C-D
Figure 7B(d) HO-1/β-actin
Tukey's multiple comparisons test	Mean Diff.	95.00% CI of diff.	Below threshold?	Summary	Adjusted P Value
CON vs. CRS	0.3757	0.08879 to 0.6626	Yes	*	0.0129	A-B
CON vs. CRS+CGA	0.02902	-0.2579 to 0.3159	No	ns	0.9874	A-C
CON vs. CRS+CGA+Brusatol	0.5959	0.3090 to 0.8828	Yes	***	0.0007	A-D
CRS vs. CRS+CGA	-0.3467	-0.6336 to -0.05977	Yes	*	0.0199	B-C
CRS vs. CRS+CGA+Brusatol	0.2202	-0.06674 to 0.5071	No	ns	0.1426	B-D
CRS+CGA vs. CRS+CGA+Brusatol	0.5669	0.2800 to 0.8538	Yes	**	0.001	C-D
Figure 7B(e) NQO1/GAPDH
Tukey's multiple comparisons test	Mean Diff.	95.00% CI of diff.	Below threshold?	Summary	Adjusted P Value
CON vs. CRS	0.3227	0.1671 to 0.4783	Yes	***	0.0007	A-B
CON vs. CRS+CGA	0.05361	-0.1020 to 0.2092	No	ns	0.6975	A-C
CON vs. CRS+CGA+Brusatol	0.3257	0.1701 to 0.4813	Yes	***	0.0007	A-D
CRS vs. CRS+CGA	-0.2691	-0.4247 to -0.1135	Yes	**	0.0024	B-C
CRS vs. CRS+CGA+Brusatol	0.002961	-0.1526 to 0.1585	No	ns	>0.9999	B-D
CRS+CGA vs. CRS+CGA+Brusatol	0.2721	0.1165 to 0.4277	Yes	**	0.0023	C-D
Figure 7C(a) HO-1/GAPDH mRNA
Tukey's multiple comparisons test	Mean Diff.	95.00% CI of diff.	Below threshold?	Summary	Adjusted P Value
CON vs. CRS	0.6267	0.3483 to 0.9051	Yes	***	0.0004	A-B
CON vs. CRS+CGA	-0.02122	-0.2996 to 0.2572	No	ns	0.9945	A-C
CON vs. CRS+CGA+Brusatol	0.414	0.1357 to 0.6924	Yes	**	0.0062	A-D
CRS vs. CRS+CGA	-0.6479	-0.9263 to -0.3696	Yes	***	0.0003	B-C
CRS vs. CRS+CGA+Brusatol	-0.2127	-0.4910 to 0.06571	No	ns	0.1448	B-D
CRS+CGA vs. CRS+CGA+Brusatol	0.4353	0.1569 to 0.7136	Yes	**	0.0046	C-D
Figure 7C(b) NQO1/GAPDH mRNA
Tukey's multiple comparisons test	Mean Diff.	95.00% CI of diff.	Below threshold?	Summary	Adjusted P Value
CON vs. CRS	0.4898	0.2056 to 0.7741	Yes	**	0.0025	A-B
CON vs. CRS+CGA	0.03592	-0.2483 to 0.3202	No	ns	0.9761	A-C
CON vs. CRS+CGA+Brusatol	0.5132	0.2289 to 0.7974	Yes	**	0.0019	A-D
CRS vs. CRS+CGA	-0.4539	-0.7382 to -0.1696	Yes	**	0.004	B-C
CRS vs. CRS+CGA+Brusatol	0.02332	-0.2610 to 0.3076	No	ns	0.9931	B-D
CRS+CGA vs. CRS+CGA+Brusatol	0.4772	0.1930 to 0.7615	Yes	**	0.0029	C-D
