# Supplementary material for: Chlorogenic acid alleviates chronic restraint stress-induced liver injury potentially via Nrf2-mediated inhibition of ferroptosis and mitochondrial apoptosis
Source: Royal Society of Chemistry journal article supplement (doi:10.1039/d5fo04627k), 2026-01-01
Supplement: d5fo04627k2.xlsx [file d5fo04627k2.xlsx]

## Sheet: Sheet1
The western blots original dates
Cleaved-caspase3					Cleaved-caspase9					Cytochrome c
0.816988	1.49055	0.91996	1.34434		0.619644	0.969619	0.73295	1.01572		0.664234	1.01584	0.789415	1.10339
0.862544	1.37096	0.847395	1.21715		0.656883	1.1609	0.691316	0.914585		0.619967	0.907049	0.634538	1.21919
0.820828	1.19294	0.740482	1.12899		0.728106	1.01734	0.413496	1.0003		0.631999	0.88821	0.561124	1.08533
Bax/Bcl-2					GPX4					TFR1
0.627779	0.886155	0.664331	0.981125		1.00557	0.814036	1.00627	0.662504		0.786081	1.03706	0.737107	0.973571
0.67143	0.829712	0.686738	0.967517		1.10474	0.870172	1.1343	0.672554		0.851913	1.28892	0.832915	1.17369
0.644475	0.847758	0.493029	0.813624		1.22743	0.752573	0.979663	0.535969		0.821459	1.23325	0.782604	1.08549
FPN					SLC7A11					N-Nrf2
0.904761	0.744555	0.973473	0.645619		1.24999	0.684492	1.11027	0.704642		1.15809	0.806362	1.02349	0.465582
1.07066	0.714574	0.905222	0.611161		1.05738	0.723223	1.1746	0.780312		1.10641	0.868654	1.15253	0.622837
1.03468	0.814702	0.935854	0.625566		1.18262	0.878391	1.27293	0.702681		1.17509	0.771447	1.30703	0.536948
C-Nrf2					HO-1					NQO1
1.28407	0.424644	1.2128	0.577323		1.08297	0.781418	1.0261	0.650062		1.23128	0.892921	1.0995	0.827008
1.04734	0.517395	1.23269	0.459693		1.03548	0.685835	1.18511	0.587883		1.16727	0.888676	1.21699	0.920025
1.0955	0.467393	1.26892	0.564811		1.26393	0.787962	1.08411	0.356715		1.14703	0.795817	1.06826	0.821497
The PCR original dates
SLC7A11					GPX4					TFR1
1.21993	0.437271	1.36473	0.792425		1.04753	0.497585	0.975464	0.544619		0.652424	1.05721	0.685434	0.856124
1.22649	0.51413	1.39543	0.883742		1.16873	0.558491	1.06492	0.604814		0.687151	1.15343	0.557834	0.854248
1.31666	0.493163	1.25318	0.817527		1.12453	0.469841	0.891614	0.523492		0.619488	0.998273	0.647834	0.805469
1.2847	0.569375	1.28941	0.805737		0.943424	0.521655	0.999164	0.64218		0.589461	1.25435	0.612752	0.875552
FPN					HO-1					NQO1
0.836947	0.471426	1.08915	0.639466		0.958543	0.496563	1.1538	0.509239		1.22246	0.883018	1.32542	0.780263
0.855725	0.574791	1.15799	0.698565		1.18548	0.393579	1.0966	0.725735		1.37089	0.748907	1.43129	0.89829
0.956487	0.426798	0.996432	0.596817		0.9817	0.355448	0.938982	0.648623		1.49415	0.986072	1.22303	0.869492
0.984614	0.54632	0.965178	0.639846
